# Supplementary material for: Proteomic Profiles of Exosomes of Septic Patients Presenting to the Emergency Department Compared to Healthy Controls
Source: MDPI journal article supplement (doi:10.3390/jcm9092930), 2020-09-11
Supplement: s1 [file s1]

To whom this may concern:

Dr. Daniel C. Morris has been granted permission by QIAGEN Silicon Valley to use copyrighted figures (both print and digital) generated from Ingenuity Pathway Analysis (IPA) for his publication.

Figures produced from IPA are available under an open-access CC-BY license for purposes of publication.

If you have any further questions, please contact QIAGEN Bioinformatics Technical Support at [ts-bioinformatics@qiagen.com](mailto:ts-bioinformatics@qiagen.com).

Best regards,

(on behalf of QIAGEN Silicon Valley)

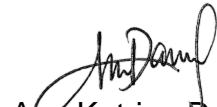

**Ana Katrina David**

Scientist, Global Bioinformatics Technical Services

---

**QIAGEN** - Sample to Insight

Phone American: +1-866-464-3684 | Danish: +45-80 82 0167

[ts-bioinformatics@qiagen.com](mailto:ts-bioinformatics@qiagen.com)

[www.qiagenbioinformatics.com](http://www.qiagenbioinformatics.com)

Making improvements in life possible.
