# Supplementary material for: Proteomic Profiles of Exosomes of Septic Patients Presenting to the Emergency Department Compared to Healthy Controls
Source: MDPI journal article supplement (doi:10.3390/jcm9092930), 2020-09-11
Supplement: s1 [file s1]

|                   | Patient 1<br>(B1) | Patient 2<br>(B1)            | Patient 3<br>(B1) | Control 1<br>(B1) | Control 2<br>(B1) | Control 3<br>(B1) | Patient 1<br>(B2) | Patient 2<br>(B2) | Patient 3<br>(B2)     | Patient 4<br>(B2) | Control 1<br>(B2) | Control 2<br>(B2) |
|-------------------|-------------------|------------------------------|-------------------|-------------------|-------------------|-------------------|-------------------|-------------------|-----------------------|-------------------|-------------------|-------------------|
| Gender            | Male              | Female                       | Female            | Male              | Female            | Female            | Male              | Male              | Male                  | Male              | Male              | Male              |
| Age               | 61                | 74                           | 52                | 55                | 24                | 39                | 64                | 81                | 68                    | 41                | 60                | 54                |
| Race              | African American  | African American             | Caucasian         | Caucasian         | Asian             | Caucasian         | African American  | African American  | African American      | Unknown           | African American  | African American  |
| Primary Source    | Blood             | Lung, Intra-abdominal        | Urogenital        | NONE              | NONE              | NONE              | Lung              | Abdomen           | Lung, Intra-abdominal | Blood             | NONE              | NONE              |
| Sepsis Class      | Shock             | Shock                        | Severe            | Healthy           | Healthy           | Healthy           | Severe            | Severe            | Shock                 | Shock             | Healthy           | Healthy           |
| 30 Day Outcome    | Died              | Alive                        | Alive             | Alive             | Alive             | Alive             | Alive             | Alive             | Alive                 | Died              | Alive             | Alive             |
| Length of Stay    | 17                | 7                            | 4                 |                   |                   |                   | 6                 | 6                 | 28                    | 11                |                   |                   |
| Day 1 SOFA Score  | 13                | 9                            | 1                 |                   |                   |                   | 4                 | 4                 | 12                    | 10                |                   |                   |
| Day 1 APACHE S    | 24                | 33                           | 15                |                   |                   |                   | 11                | 30                | 34                    | 27                |                   |                   |
| Culture Positive? | Wound             | Urine, Blood                 | Urine             |                   |                   |                   | Nasal Swab        | Urine             | None                  | None              |                   |                   |
| Organism          | P. aeruginosa     | C. albicans, Staph, coag (-) | E. Coli           |                   |                   |                   | Influenza A       | Enterococcus sp.  | None                  | None              |                   |                   |
| Vasopressor Use   | Yes               | Yes                          | No                |                   |                   |                   | No                | No                | Yes                   | Yes               |                   |                   |
| Highest Lactate   | 10.8              | 10                           | 4.5               |                   |                   |                   | 8.5               | 1.1               | 3.1                   | 1.6               |                   |                   |

Supplemental Table S1. Patient Characteristics
